# Supplementary material
Source: PubMed Central journal article supplement (PMC3416601)
Supplement: AEM.00956-12_zam999103546so1.pdf [file AEM.00956-12_zam999103546so1.pdf]

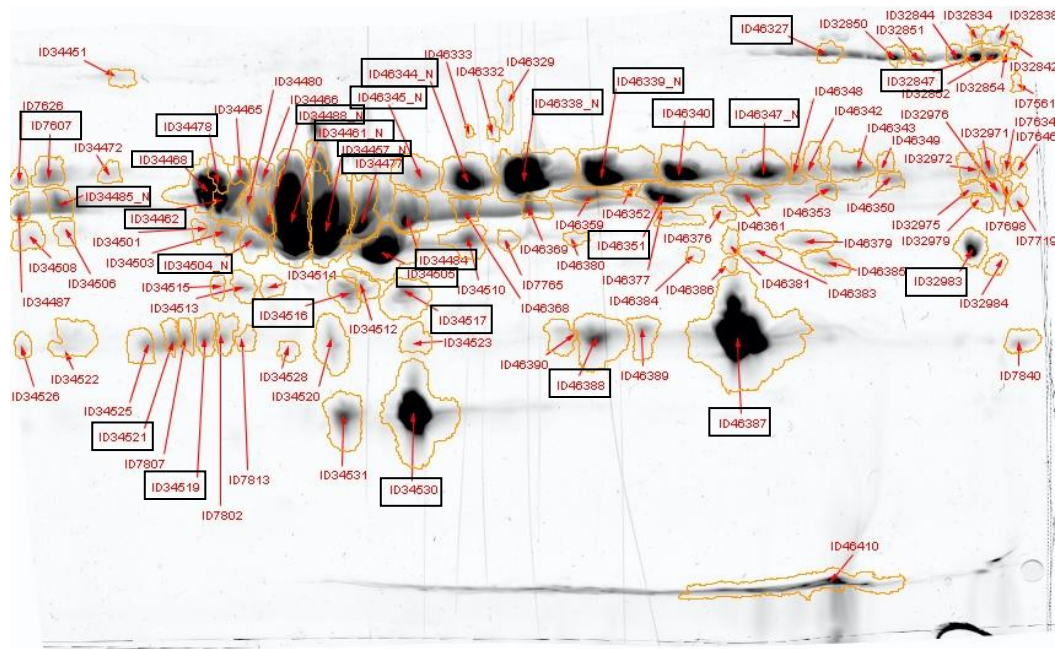

**Figure S1.** 2-D gel analysis of HLZ transgenic and non-transgenic control goat milk. Composite image of milk from individual HLZ transgenic and non-transgenic control goats at peak lactation used for quantification and identification of proteins. Boxed ID numbers indicate spots chosen for mass spectrometry.

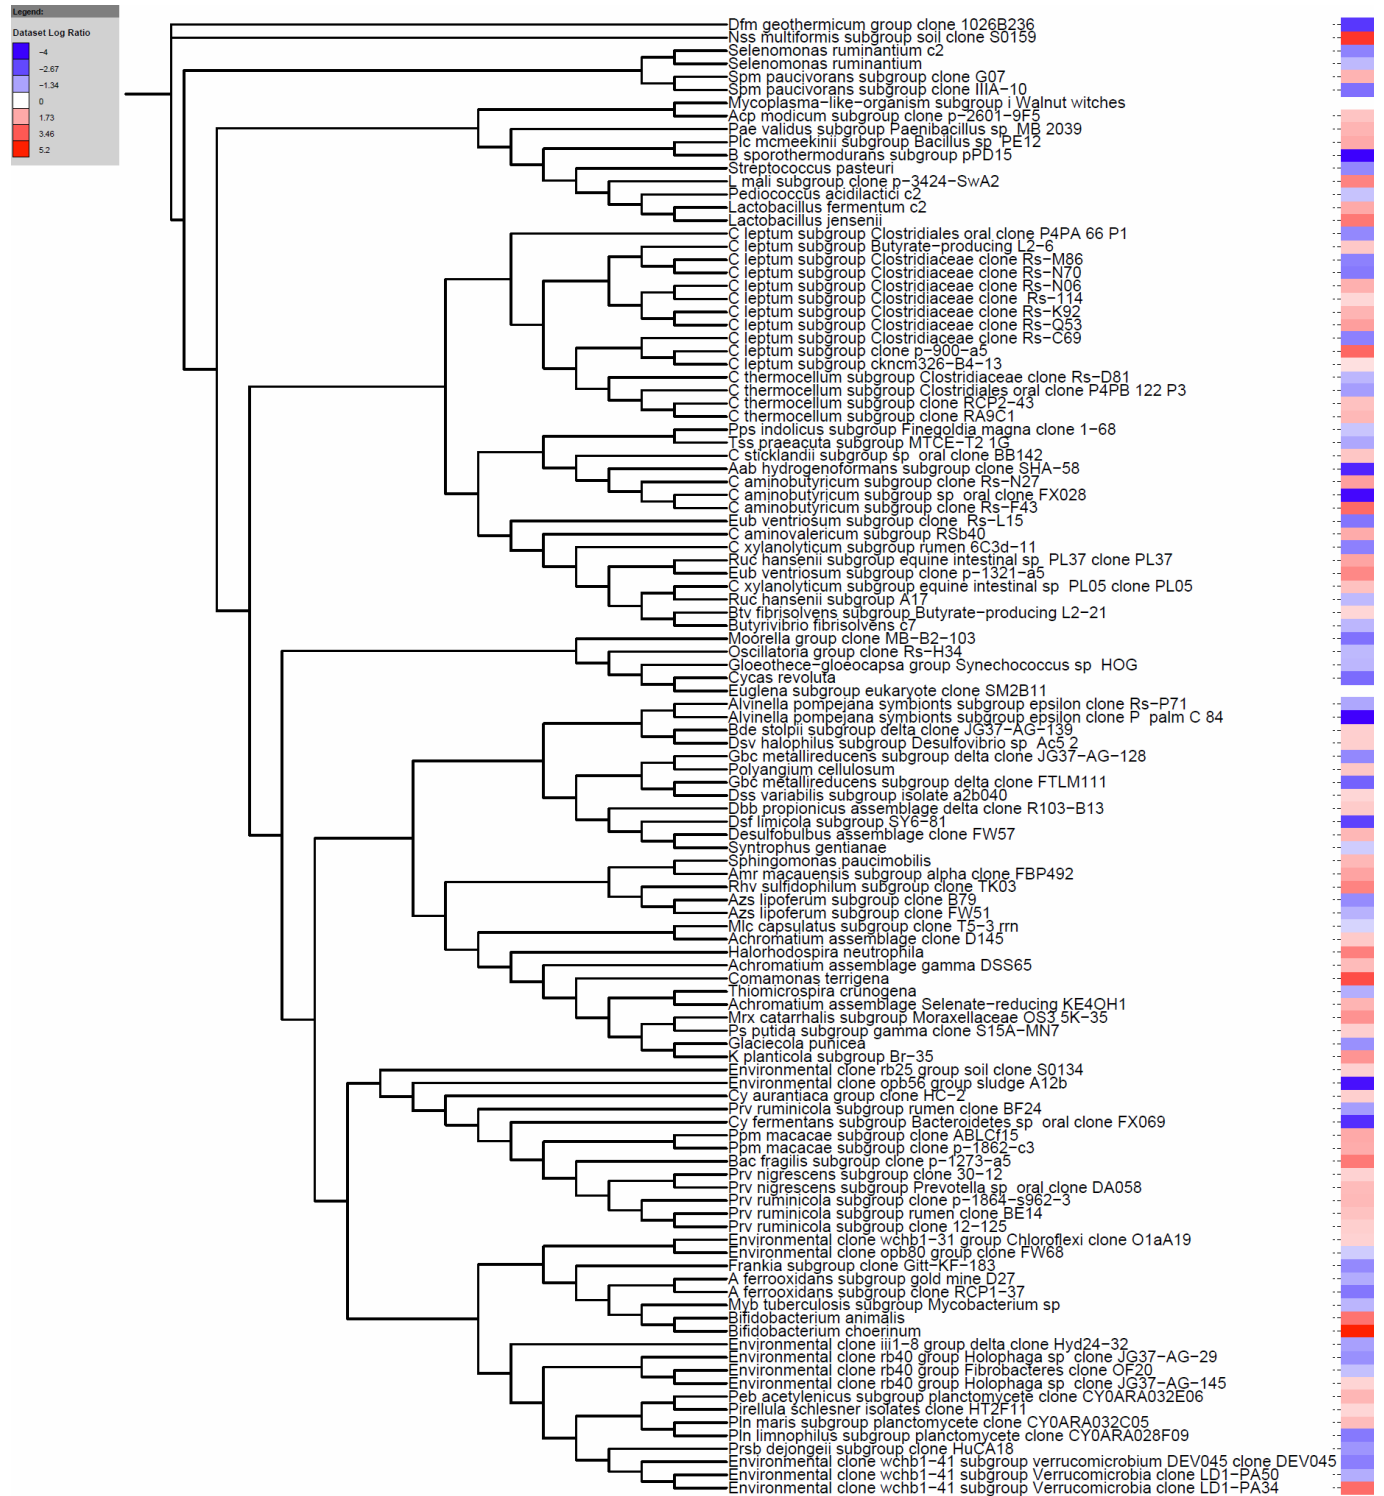

**Figure S2.** Log<sub>2</sub> ratios of all significantly different OTUs ( $q \leq 0.05$ ) between control and HLZ fed pigs at day 17 as determined by the Phylochip. The tree was constructed using RaxML and iTOL.

**Table S1.** Significant differences in OTUs at the family level determined by G2 Phylochip analysis after 14 days of HLZ milk consumption

| <b>Phyla</b>                  | <b>OTUs enriched by HLZ milk</b>                                                                                                                                                                                                                                                                                                                                                                                  | <b>OTUs reduced by HLZ milk</b>                                                                                                                                                                                                                                                                                                                                                      |
|-------------------------------|-------------------------------------------------------------------------------------------------------------------------------------------------------------------------------------------------------------------------------------------------------------------------------------------------------------------------------------------------------------------------------------------------------------------|--------------------------------------------------------------------------------------------------------------------------------------------------------------------------------------------------------------------------------------------------------------------------------------------------------------------------------------------------------------------------------------|
| <b><i>Actinobacteria</i></b>  | <i>Bifidobacteriaceae</i><br><i>Kineosporiaceae</i>                                                                                                                                                                                                                                                                                                                                                               | <i>Actinobacteria</i> (class)<br><i>Acidothermaceae</i><br><i>Coriobacteriaceae</i><br><i>Corynebacteriaceae</i><br><i>Mycobacteriaceae</i><br><i>Rubrobacteraceae</i>                                                                                                                                                                                                               |
| <b><i>Bacteroidetes</i></b>   | <i>Bacteroidetes</i> (phyla)<br><i>Bacteroidaceae</i><br><i>Flexibacteraceae</i><br><i>Porphyromonadaceae</i><br><i>Prevotellaceae</i>                                                                                                                                                                                                                                                                            |                                                                                                                                                                                                                                                                                                                                                                                      |
| <b><i>Firmicutes</i></b>      | <i>Paenibacillaceae</i><br><i>Aerococcaceae</i><br><i>Lactobacillaceae</i><br><i>Clostridiaceae</i><br><i>Lachnospiraceae</i><br><i>Syntrophomonadaceae</i><br><i>Acholeplasmataceae</i><br><i>Erysipelotrichaceae</i><br><i>Entomoplasmataceae</i>                                                                                                                                                               | <i>Firmicutes</i> (phyla)<br><i>Clostridiales</i> (order)<br><i>Clostridia</i> (class)<br><i>Bacillaceae</i><br><i>Enterococcaceae</i><br><i>Streptococcaceae</i><br><i>Peptococc/Acidaminococc</i><br><i>Peptostreptococcaceae</i>                                                                                                                                                  |
| <b><i>Proteobacteria</i></b>  | <i>Betaproteobacteria</i> (class)<br><i>Gammaproteobacteria</i> (class)<br><i>Sphingomonadaceae</i><br><i>Comamonadaceae</i><br><i>Bdellovibrionaceae</i><br><i>Desulfobacteraceae</i><br><i>Desulfobulbaceae</i><br><i>Desulfovibrionaceae</i><br><i>Polyangiaceae</i><br><i>Ectothiorhodospiraceae</i><br><i>Enterobacteriaceae</i><br><i>Pseudomonadaceae</i><br><i>Francisellaceae</i><br><i>Vibrionaceae</i> | <i>Deltaproteobacteria</i> (class)<br><i>Hyphomicrobiaceae</i><br><i>Methylobacteriaceae</i><br><i>Rhodobacteraceae</i><br><i>Burkholderiaceae</i><br><i>Oxalobacteraceae</i><br><i>Geobacteraceae</i><br><i>Syntrophaceae</i><br><i>Syntrophobacteraceae</i><br><i>Helicobacteraceae</i><br><i>Campylobacterales</i> (order)<br><i>Aeromonadaceae</i><br><i>Piscirickettsiaceae</i> |
| <b><i>Spirochaetes</i></b>    | <i>Spirochaetaceae</i>                                                                                                                                                                                                                                                                                                                                                                                            |                                                                                                                                                                                                                                                                                                                                                                                      |
| <b><i>Verrucomicrobia</i></b> |                                                                                                                                                                                                                                                                                                                                                                                                                   | <i>Verrucomicrobia</i> (phyla)<br><i>Verrucomicrobiaceae</i>                                                                                                                                                                                                                                                                                                                         |
